## CORRECTION

# Correction: Vegetally localized *Xenopus trim36* regulates cortical rotation and dorsal axis formation

**Tawny N. Cuykendall and Douglas W. Houston**

There was an error in *Development* (2009) **136**, 3057-3065 (doi:10.1242/dev.036855).

In the legend of Fig. 6, the same image was inadvertently used for the control samples in panels A and G.

The authors apologise to readers for this error, which does not impact the results or conclusions of this article.
